# Supplementary material
Source: PubMed Central journal article supplement (PMC4703290)
Supplement: SD3.pdf [file SD3.pdf]

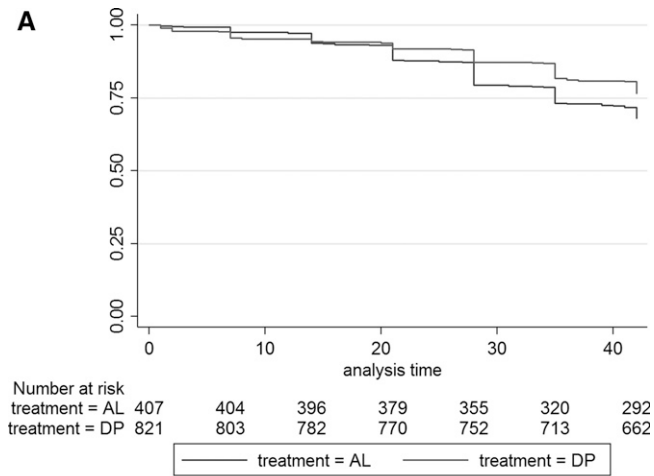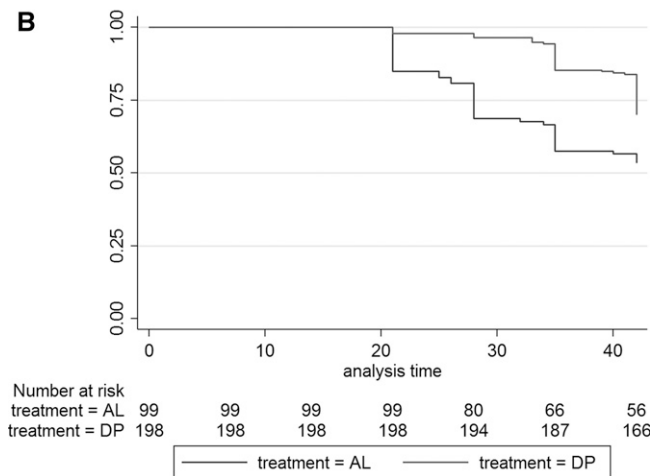

SUPPLEMENTAL FIGURE 1. Kaplan Meier curves for DP and AL treatment in low-to-moderate (**A**) and moderate-to-high (**B**) malaria transmission setting. AL = artemether-lumefantrine; DP = dihydroartemisinin-piperazine.

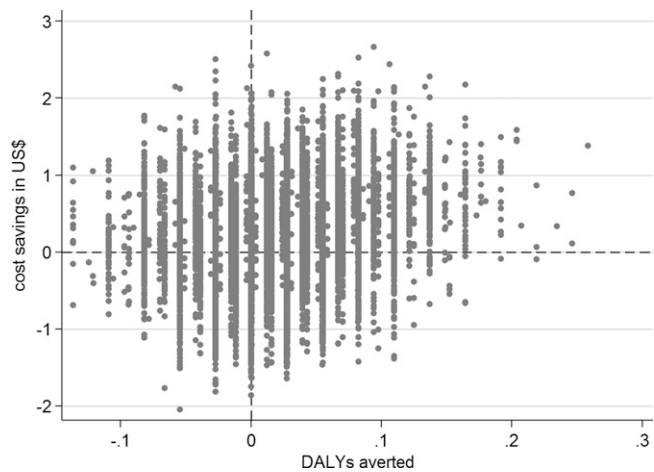

SUPPLEMENTAL FIGURE 2. Scatterplot of incremental costs and effectiveness for DP vs. AL for first-line treatment of uncomplicated *Plasmodium falciparum* malaria in the low-to-moderate transmission scenario (10,000 iterations) (all values are calculated per child over 1 year). AL = artemether-lumefantrine; DP = dihydroartemisinin-piperazine.

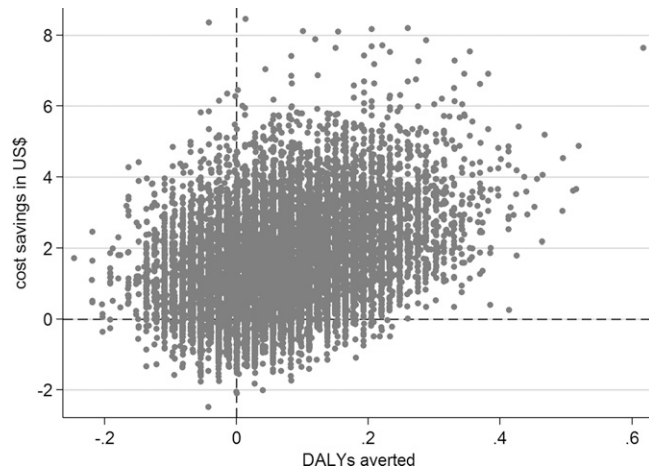

SUPPLEMENTAL FIGURE 3. Scatterplot of incremental costs and effectiveness for DP vs. AL for first-line treatment of uncomplicated *Plasmodium falciparum* malaria in the moderate-to-high transmission scenario (10,000 iterations) (all values are calculated per child over 1 year). AL = artemether–lumefantrine; DP = dihydroartemisinin–piperaquine.

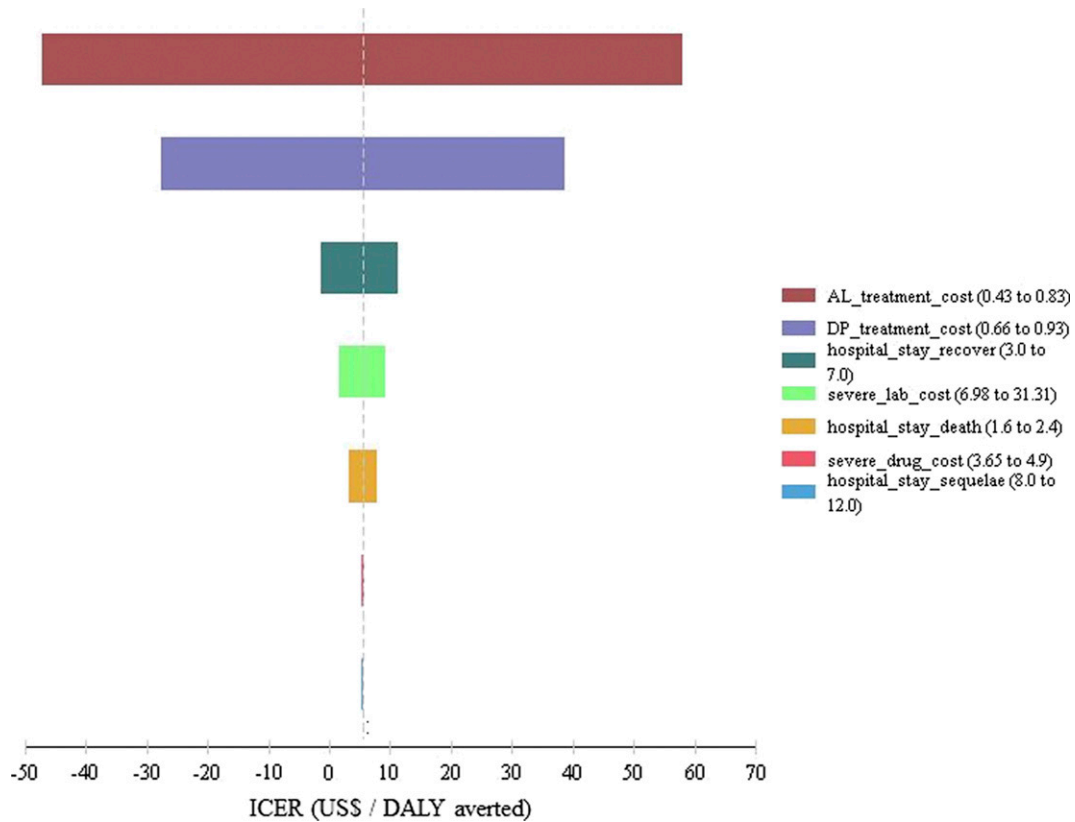

SUPPLEMENTAL FIGURE 4. Tornado diagram: univariate sensitivity analyses for the low-to-moderate transmission scenario.

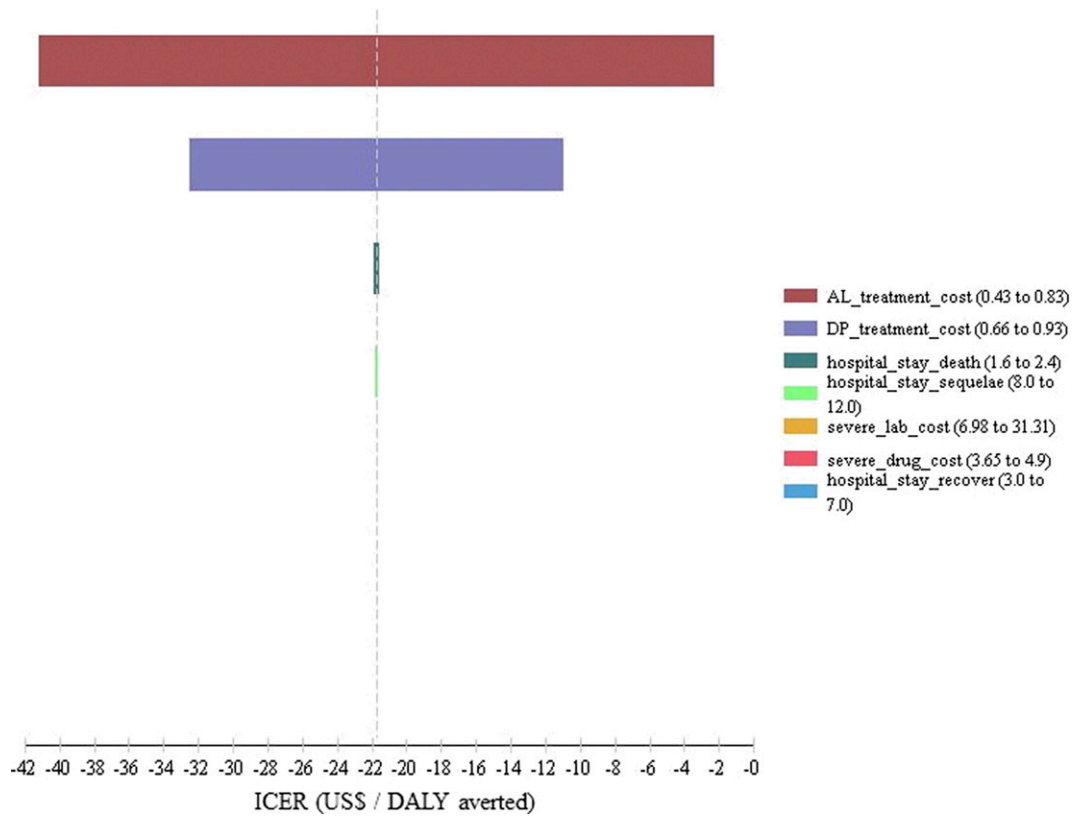

SUPPLEMENTAL FIGURE 5. Tornado diagram: univariate sensitivity analyses for the moderate-to-high transmission scenario.

SUPPLEMENTAL TABLE 1  
Day 42 treatment failure rates for DP and AL

| Study site                                               | Country      | All patients             |                         | DP treatment             |                         | AL treatment             |                         |
|----------------------------------------------------------|--------------|--------------------------|-------------------------|--------------------------|-------------------------|--------------------------|-------------------------|
|                                                          |              | Sample size ( <i>n</i> ) | Day 42 failure rate (%) | Sample size ( <i>n</i> ) | Day 42 failure rate (%) | Sample size ( <i>n</i> ) | Day 42 failure rate (%) |
| Low-to-moderate transmission: day 42 failure rate < 35%  |              |                          |                         |                          |                         |                          |                         |
| Epicentre, Mbarara                                       | Uganda       | 276                      | 23.91                   | 185                      | 20.00                   | 91                       | 31.87                   |
| Kilifi, KEMRI-Wellcome Trust Collaborative Program       | Kenya        | 222                      | 29.73                   | 150                      | 30.67                   | 72                       | 27.78                   |
| Centro de Investigaçao em Saude de Manhica               | Mozambique   | 445                      | 25.84                   | 299                      | 24.08                   | 146                      | 29.45                   |
| Tropical Diseases Research Center, Ndola                 | Zambia       | 304                      | 30.59                   | 203                      | 25.62                   | 101                      | 40.59                   |
| Moderate-to-high transmission: day 42 failure rate ≥ 35% |              |                          |                         |                          |                         |                          |                         |
| Center Muraz, Nanaro                                     | Burkina Faso | 301                      | 36.21                   | 301                      | 30.85                   | 100                      | 47.00                   |
| All study sites                                          |              |                          |                         |                          |                         |                          |                         |
| Total                                                    | -            | 1,548                    | 29.01                   | 1,038                    | 25.92                   | 510                      | 35.29                   |

AL = artemether-lumefantrine; DP = dihydroartemisinin-piperazine.

SUPPLEMENTAL TABLE 2

Baseline and posttreatment hazard rates for recurrent malaria by antimalarial treatment and transmission setting

| Transmission setting | Low-to-moderate transmission |        | Medium-to-high transmission |        |
|----------------------|------------------------------|--------|-----------------------------|--------|
|                      | Hazard rate                  | SD     | Hazard rate                 | SD     |
| Baseline hazard rate | 0.0795                       | 0.0088 | 0.1319                      | 0.0228 |
| DP treatment         |                              |        |                             |        |
| Week 1               | 0.0219                       | 0.0052 | 0.0000                      | 0.0000 |
| Week 2               | 0.0262                       | 0.0057 | 0.0000                      | 0.0000 |
| Week 3               | 0.0153                       | 0.0044 | 0.0000                      | 0.0000 |
| Week 4               | 0.0234                       | 0.0055 | 0.0202                      | 0.0101 |
| Week 5               | 0.0519                       | 0.0083 | 0.0361                      | 0.0136 |
| Week 6               | 0.0715                       | 0.0100 | 0.1123                      | 0.0245 |
| AL treatment         |                              |        |                             |        |
| Week 1               | 0.0074                       | 0.0043 | 0.0000                      | 0.0000 |
| Week 2               | 0.0198                       | 0.0070 | 0.0000                      | 0.0000 |
| Week 3               | 0.0429                       | 0.0104 | 0.0000                      | 0.0000 |
| Week 4               | 0.0633                       | 0.0129 | 0.1919                      | 0.0440 |
| Week 5               | 0.0986                       | 0.0167 | 0.1750                      | 0.0468 |
| Week 6               | 0.0875                       | 0.0165 | 0.1515                      | 0.0479 |

AL = artemether-lumefantrine; DP = dihydroartemisinin-piperazine; SD = standard deviation.
